# Supplementary material for: M1-polarized macrophage-derived cellular nanovesicle-coated lipid nanoparticles for enhanced cancer treatment through hybridization of gene therapy and cancer immunotherapy
Source: PubMed Central journal article supplement — Acta Pharm Sin B. 2024 Mar 7;14(7):3169–83. doi: 10.1016/j.apsb.2024.03.004 (PMC11252390; doi:10.1016/j.apsb.2024.03.004), 2024-03-07
Supplement: mmc1.pdf [file mmc1.pdf]

**Supporting Information for**

**ORIGINAL ARTICLE**

**M1-polarized macrophage-derived cellular nanovesicle-coated lipid nanoparticles for enhanced cancer treatment through hybridization of gene therapy and cancer immunotherapy**

Ha Eun Shin<sup>a</sup>, Jun-Hyeok Han<sup>a,b</sup>, Seungyong Shin<sup>a</sup>, Ga-Hyun Bae<sup>a,c</sup>, Boram Son<sup>d</sup>, Tae-Hyung Kim<sup>e</sup>, Hee Ho Park<sup>d</sup>, Chun Gwon Park<sup>b,f,g,\*</sup>, Wooram Park<sup>a,c,g,\*</sup>

<sup>a</sup>*Department of Integrative Biotechnology, Sungkyunkwan University (SKKU), Suwon, Gyeonggi 16419, Republic of Korea*

<sup>b</sup>*Department of Intelligent Precision Healthcare Convergence, SKKU, Suwon, Gyeonggi 16419, Republic of Korea*

<sup>c</sup>*Department of MetaBioHealth, SKKU Institute for Convergence, SKKU, Suwon, Gyeonggi 16419, Republic of Korea*

<sup>d</sup>*Department of Bioengineering, Hanyang University, Seoul 04763, Republic of Korea*

<sup>e</sup>*Department of Integrative Engineering, Chung-Ang University, Seoul 06974, Republic of Korea*

<sup>f</sup>*Department of Biomedical Engineering, SKKU, Suwon, Gyeonggi 16419, Republic of Korea*

<sup>g</sup>*Korea Institute of Science and Technology (KIST), Seoul 02792, Republic of Korea*

Received 5 January 2024; received in revised form 25 January 2024; accepted 7 February 2024

\*Corresponding authors.

E-mail addresses: [parkwr@skku.edu](mailto:parkwr@skku.edu) (Wooram Park), [chunpark@skku.edu](mailto:chunpark@skku.edu) (Chun Gwon Park).

Running title: A combined gene-immunotherapy approach against solid tumor

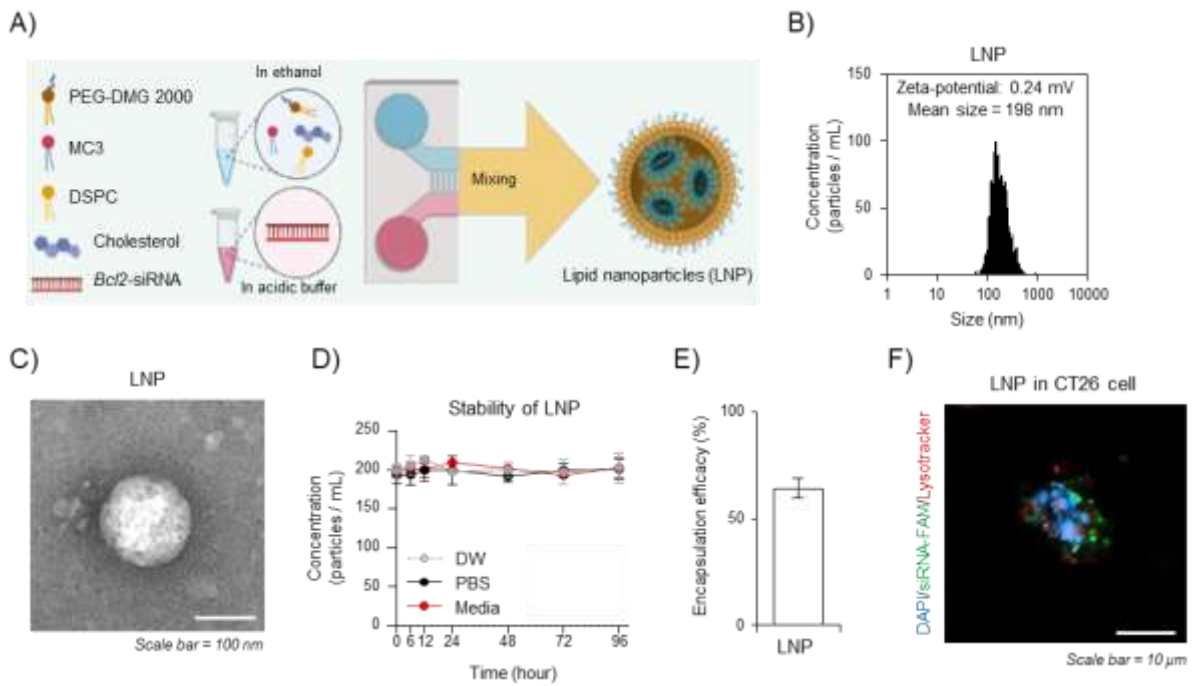

**Figure S1** Synthesis and characterization of siRNA-loaded lipid nanoparticles (LNPs). (A) The siRNA-loaded LNPs. (B) Average diameter and surface zeta-potential of LNPs determined by nanoparticle tracking analysis (NTA). (C) Representative transmission electron microscopy image of LNPs. (D) Average diameter for stability of LNPs in deionized water (DW), phosphate-buffered saline (PBS), or cell culture media. (E) Encapsulation efficiency (%) of LNPs with siRNA. (F) Confocal image of CT26 cells after treatment with siRNA-FAM-loaded LNPs. Green, red, and blue colors in the image represent FAM-siRNA, lysosomes, and nuclei, respectively. Scale bar: 10 μm. Data are presented as the mean ± SD (n=3).

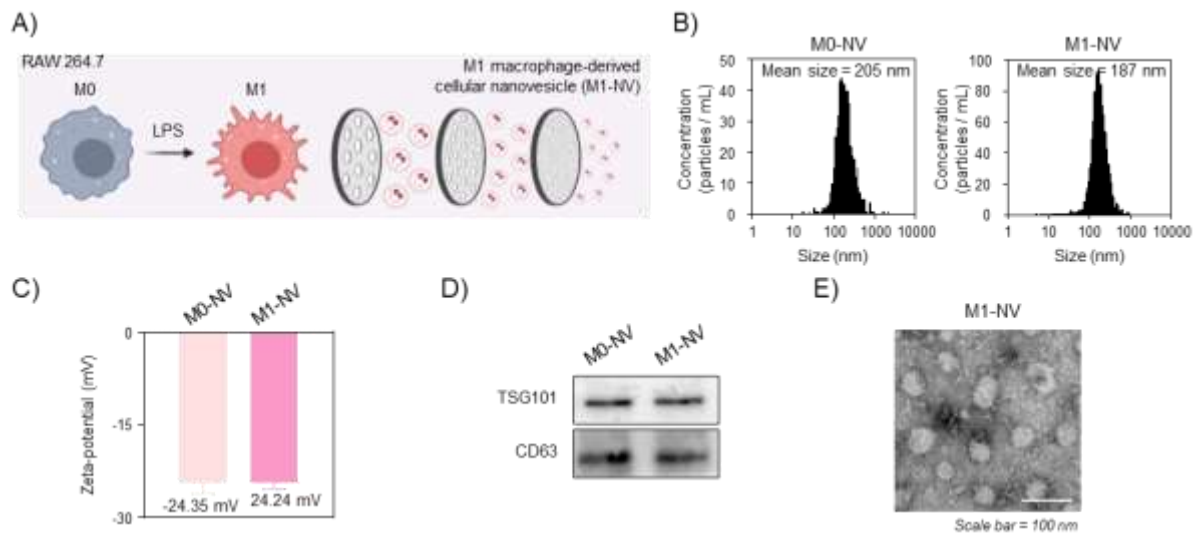

**Figure S2** Development of M1 macrophage-derived cellular nanovesicles (M1-NVs). (A) Preparation of M1-NVs. (B and C) Average diameter and surface zeta-potential of M0 macrophage-derived cellular nanovesicles (M0-NVs) and M1-NVs. (D) Expression of exosome markers in M0-NVs and M1-NVs analysed by Western blotting. (E) Representative transmission electron microscopy image of M1-NVs (Scale bar: 100 nm). Data are presented as the mean  $\pm$  SD (n=3).

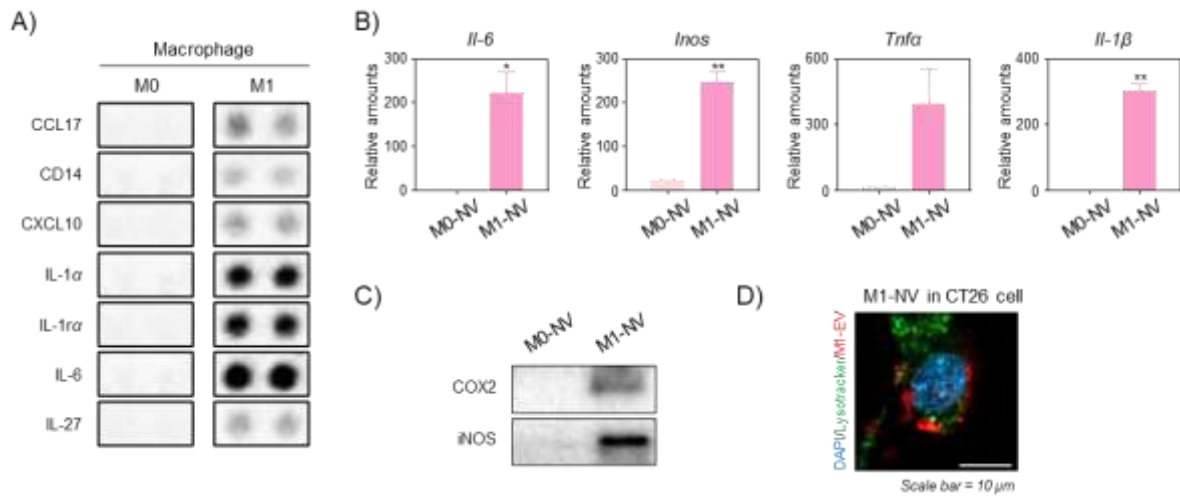

**Figure S3** Development and characterization of M1 macrophage-derived cellular nanovesicles (M1-NVs). (A) Analysis of expressed cytokines in M1 macrophages estimated by cytokine array. (B) Expression of RNA levels of inflammatory cytokines in M0-NVs and M1-NVs analysed by real-time PCR. (C) Expression of protein levels of inflammatory cytokines in M0-NVs and M1-NVs estimated by Western blotting. (D) Confocal image of CT26 cells after treatment with M1-NVs. Green, red, and blue colors in the image represent lysosomes, M1-NVs, and nuclei, respectively. Scale bar: 10  $\mu$ m. Data are presented as the mean  $\pm$  SD (n=3, \* $P$ <0.05, \*\* $P$ <0.01).

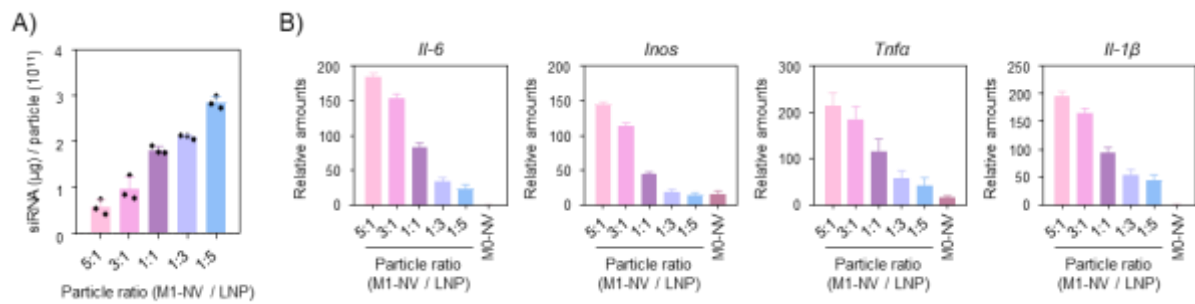

**Figure S4** Evaluation of loaded gene and inflammatory cytokines for nanoparticles coated with M1 macrophage-derived cellular nanovesicles (M1-NVs) on lipid nanoparticles (LNPs) at various particle number ratios. (A) Quantitative evaluation of loaded gene in several nanoparticles coated with M1-NVs on LNPs at various particle number ratios using ribogreen assay. (B) Expression of mRNA levels of inflammatory cytokines in several nanoparticles coated with M1-NVs on LNPs at various particle number ratios confirmed by real-time PCR. Data are presented as the mean  $\pm$  SD (n=3).

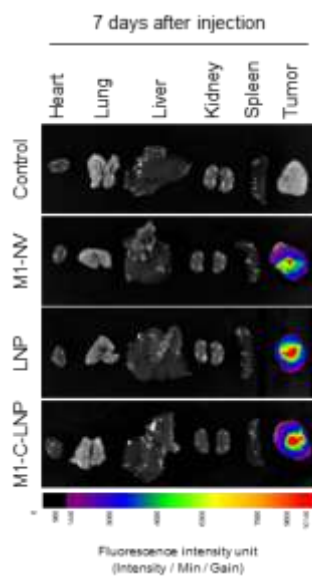

**Figure S5** *In vivo* fluorescent image of tissues in CT26 mouse model 7 days after the intratumoral injection of PBS, M1 macrophage-derived cellular nanovesicles (M1-NVs), lipid nanoparticles (LNPs), or M1-NV-coated lipid nanoparticles (M1-C-LNPs).

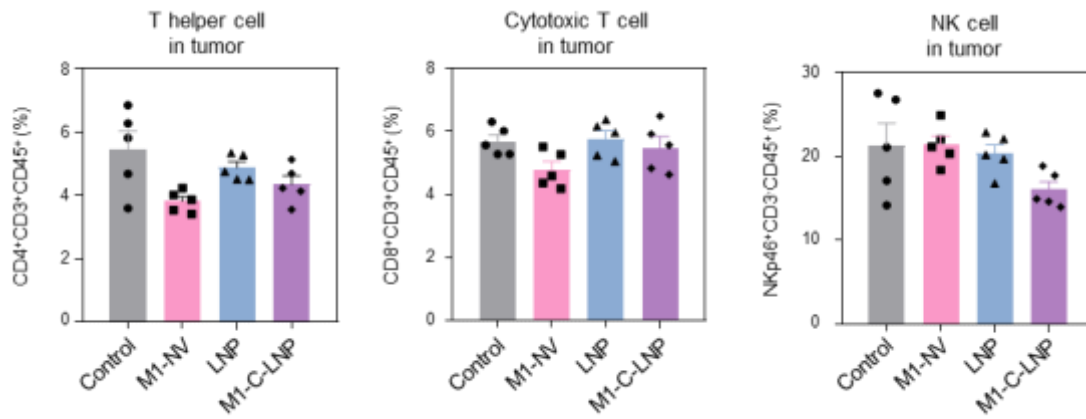

**Figure S6** Flow cytometric immunophenotyping of the changed population for intratumoral T and NK cells in CT26 tumor bearing mice model after intratumoral injection of PBS, M1-NVs, LNPs, or M1-C-LNPs. Data are presented as the mean  $\pm$  SEM (n=5).

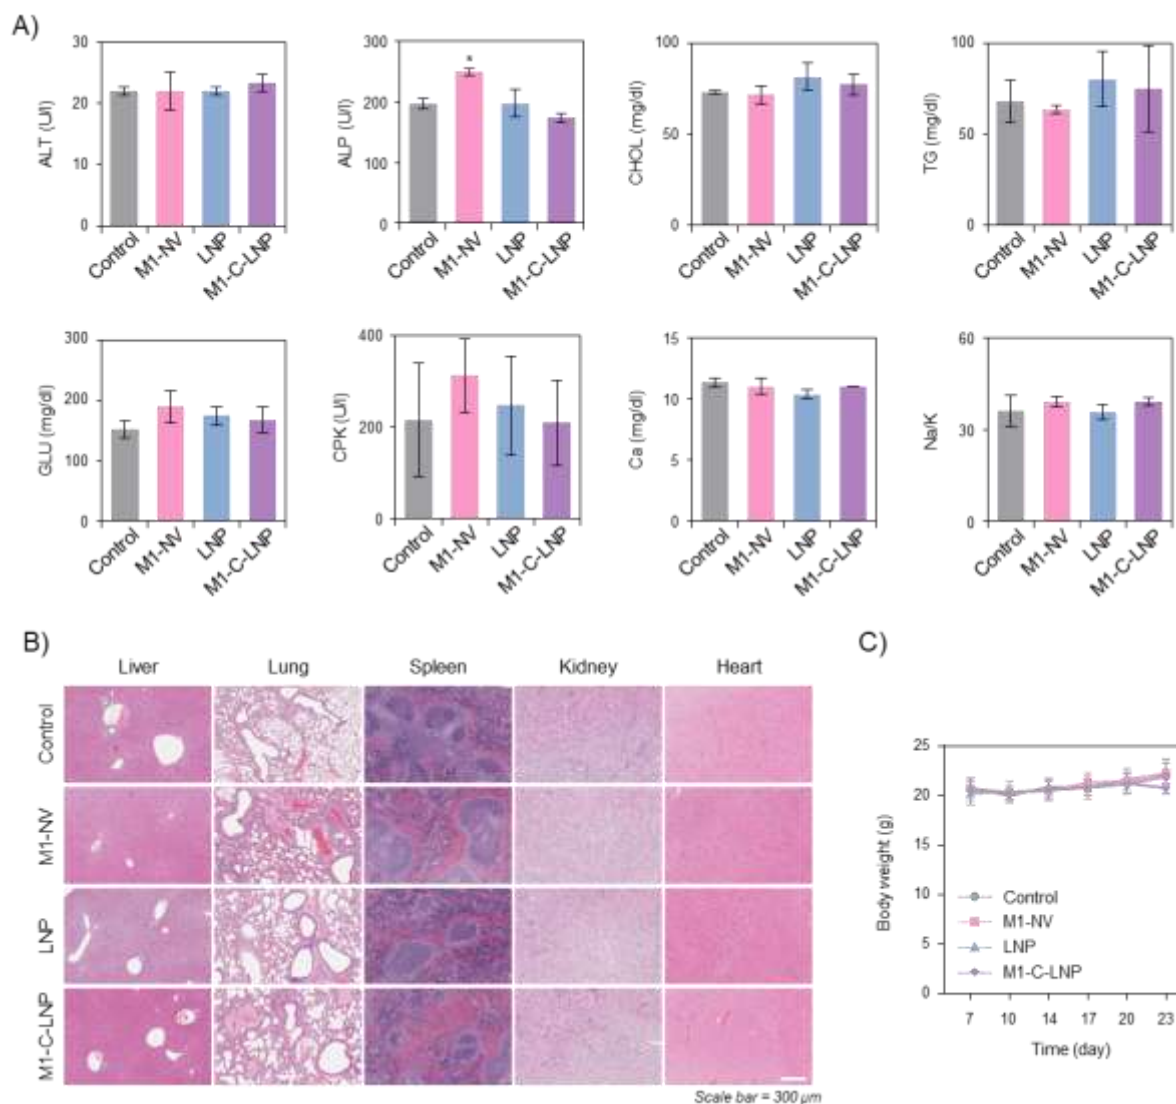

**Figure S7** *In vivo* biocompatibility analysis of M1 macrophage-derived cellular nanovesicle-coated lipid nanoparticles (M1-C-LNPs) in CT26 tumor mouse model. (A) Blood biochemical analysis after the administration of PBS, M1 macrophage-derived cellular nanovesicles (M1-NVs), lipid nanoparticles (LNPs), or M1-C-LNPs. (B) Representative images of hematoxylin and eosin (H&E) stained major organs after the administration of PBS, M1-NVs, LNPs, or M1-C-LNPs. Scale bar: 300  $\mu\text{m}$ . (C) Mean change in body weight of mice during treatment with PBS, M1-NVs, LNPs, or M1-C-LNPs. Data are presented as the mean  $\pm$  SEM ( $n=5$ ,  $*P<0.05$ ).



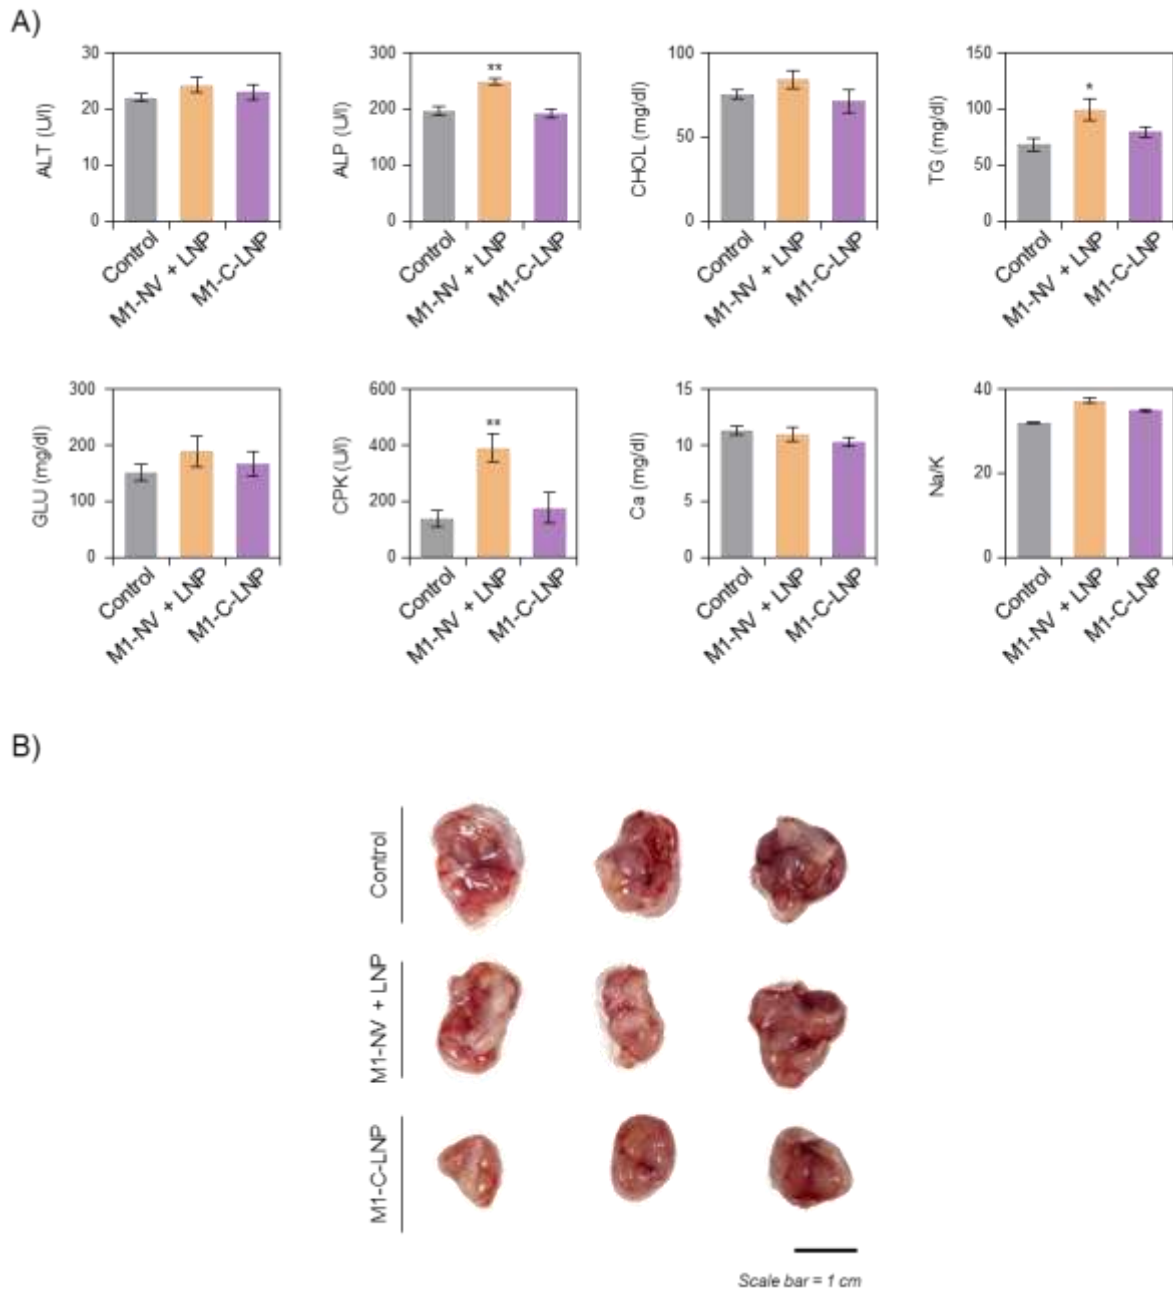

**Figure S8** *In vivo* analysis for M1-C-LNPs compared with a simple mixture in CT26 bearing tumor mouse model. (A) Blood biochemical analysis after the administration of the mixture of M1 macrophage-derived cellular nanovesicles (M1-NVs) and lipid nanoparticles (LNPs) or M1-C-LNPs in a CT26 mouse model. (B) Representative images of tumor after the administration of PBS, the mixture of M1-NVs and LNPs, or M1-C-LNPs 7 days after last administration. Scale bar: 1 cm. Data are presented as the mean  $\pm$  SEM ( $n=3$ , \* $P<0.05$ , \*\* $P<0.01$ ).
